Green et al. Supplementary Figure 1

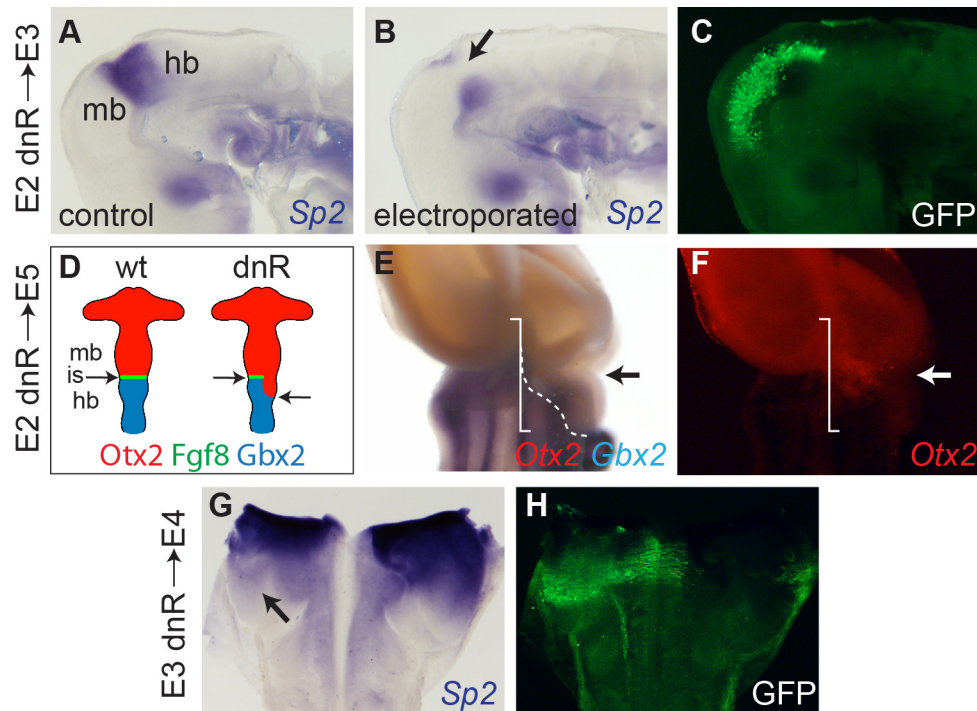

**Supplementary Fig.1. The *dn-fgfr3c* expression construct recapitulates loss of FGF signalling**

Electroporation of *dn-fgfr3c* + *gfp* at E2 (A-F) or E3 (G,H), analysed at E3 (A,B), E4 (G,H) and E5 (E,F) results in a caudal shift (indicated by white line) in the position of the midbrain-hindbrain boundary (schematic D), as shown in the expression of *Otx2* (E,F red) and *Gbx2* (E, blue). Embryos were photographed as hemisected heads (A-C) or in whole-mount (dorsal view, E-F: arrow indicates electroporated side). Electroporation of *dnR* leads to a down-regulation of *Sprouty2* suggesting FGF signalling is attenuated by this construct.

Green et al. Supplementary Figure 2

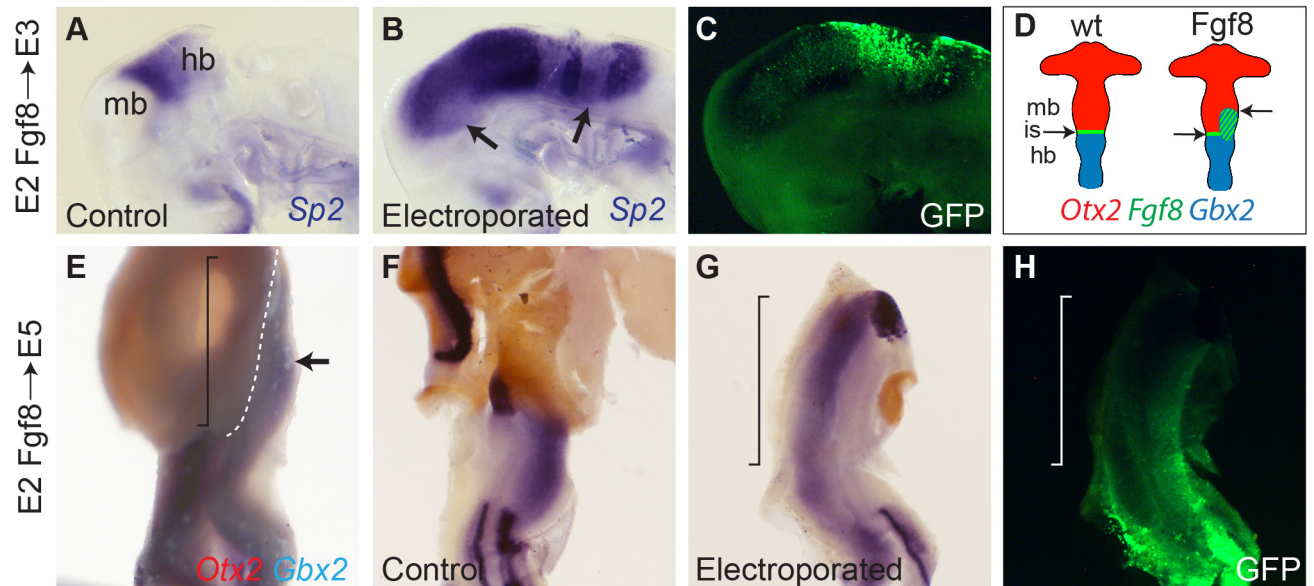

**Supplementary Fig. 2. The *Fgf8* overexpression construct recapitulates FGF signal upregulation.**

Electroporation of *Fgf8* + *gfp* at E2 leads to an up-regulated expression of *Sprouty2* at E3 (A-C) and induces a rostral shift (indicated with line) in the position of the midbrain-hindbrain boundary (schematic D) at E5, as shown by the expression of *Otx2* (E,F red) and *Gbx2* (E, blue) in hemisected heads or whole-mount brains.
